# Supplementary material
Source: ML conference proceedings conference paper supplement (https://openaccess.thecvf.com/content/ICCV2025/html/Luo_Mixed_Signals_A_ICCV_2025_paper.html)
Supplement: Supplementary file 1 [file Luo_Mixed_Signals_A_ICCV_2025_supplemental.pdf]

# Mixed Signals: A Diverse Point Cloud Dataset for Heterogeneous LiDAR V2X Collaboration

## Appendix

In this appendix material, we include: 1) extra details about the Mixed Signals dataset and the provided code devkit, 2) annotation details and instructions given to annotators, and 3) additional sensor details. We include an additional dataset teaser video in the dataset website\* that we encourage readers to watch.

### A. Data and Devkit

Please see <https://mixedsignalsdataset.cs.cornell.edu/> for the dataset download instructions and the provided devkit. Below, we add a brief description of the devkit and visualize a dataset sample.

#### A.1. Devkit Description

We provide a separate devkit and additionally integrate our dataset into the framework OpenCOOD [42], which offers the implementation of various state-of-the-art collaborative perception methods. As OpenCOOD only provides single-class models, we adapt its implementation of Early, Intermediate, and Late Fusion models to detect three classes, including vehicles, bikes, and pedestrians. We added detection heads of 1-by-1 convolution layers to existing architectures to achieve this. In addition, we add the recent *Laly* fusion [7] to this framework. Every model in our benchmark uses PointPillar [20] as the backbone. Interested readers can refer to our devkit<sup>†</sup> and code release<sup>‡</sup> and extended OpenCOOD integration for further details on architectures and training settings.

#### A.2. Sample Data

Figure A1 shows an example of the collected data, where the points are colour-coded to represent the different LiDARs. The dataset aims to replicate realistic urban scenarios that reflect the complexities of real-world implementations by using multiple vehicles with diverse sensor configurations and a roadside unit. Real-world deployments of autonomous vehicles on streets incorporate LiDARs, which are becoming more affordable. Roadside infrastructure, such as roadside units, is also gaining popularity for traffic monitoring and data analytics, now often equipped with LiDAR, traffic light timing information, and communication systems to enhance robustness and applicability.

\*<https://sites.coecis.cornell.edu/mixedsignals/#introvid>

<sup>†</sup><https://github.com/quan-dao/mixed-signals-devkit>

<sup>‡</sup><https://github.com/acfr/Mixed-Signals-Dataset>

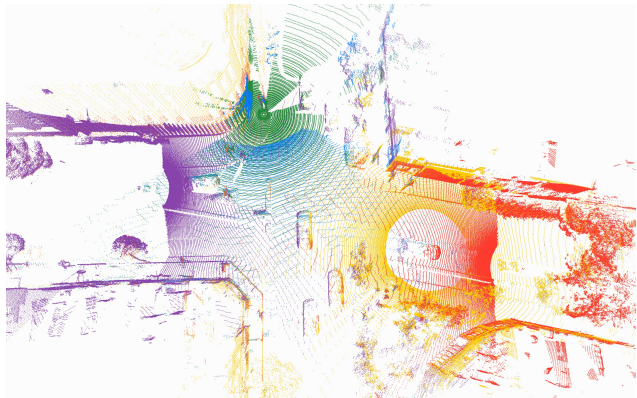

Figure A1. **Top-down view of the data collected at the location.** LiDAR point clouds are colored by the vehicle and RSU that collected them, consisting of the 3 vehicle agents (red, yellow, and purple) and the Top and Dome LiDAR sensors of the RSU (green, blue). Best viewed in colour.

Our dataset consists of LiDAR point clouds, which offer the advantage of not capturing identifiable information like faces or license plates, thus preserving data privacy. This contrasts with camera images, which often require post-processing to anonymize sensitive details, potentially affecting data quality. Our dataset includes tracking IDs for each bounding box, and this information will be released alongside this paper. Benchmarks will be made available at a later date.

**Intensity Distributions.** Figure A2 shows LiDAR intensity distributions from RSU TOP, DOME, and Laser car sensors. DOME and TOP sensors record higher intensities because there is a large number of static objects (e.g., buildings, traffic lights) near them. In contrast, the Laser car sensor presents a smoother decline in intensity values because of its location on the vehicle, which allows the detection of objects at greater distances. EV-1 and EV-2 sensors do not capture intensity readings. Therefore, a uniform approach to utilizing intensity values across all agent models would be inadequate.

### B. Annotation Instructions

We provide the instructions given to the Segments.ai<sup>§</sup> annotators in the attached material, titled “*Spec Document - Multi-sensor labeling*” at the bottom of the appendix. We selected to invest in the quality of the annotations, applying

<sup>§</sup><https://segments.ai/>

| Category                              | Definition                                                                                                                                                                            |
|---------------------------------------|---------------------------------------------------------------------------------------------------------------------------------------------------------------------------------------|
| Car                                   | Includes passenger vehicles such as sedans, hatchbacks, SUVs, and coupes that are designed primarily for the transportation of passengers.                                            |
| Truck                                 | Encompasses larger vehicles primarily used for transporting goods and materials. This category includes pickup trucks, delivery trucks, and heavy-duty trucks.                        |
| Emergency Vehicle                     | Vehicles designated for emergency response, including ambulances, fire trucks, police cars, and other vehicles equipped with sirens and emergency lights.                             |
| Bus                                   | Large motor vehicles designed to carry numerous passengers. Buses include city transit buses, school buses, and intercity coaches. They usually have designated routes and schedules. |
| Motorcycle<br>Motorized Bike          | Two-wheeled motor vehicles, including motorcycles and motorized bikes. This category also covers scooters and mopeds.                                                                 |
| Portable Personal<br>Mobility Vehicle | Small, lightweight vehicles designed for personal mobility, including electric scooters, hoverboards, and segways.                                                                    |
| Bicycle                               | Human-powered, pedal-driven vehicles with two wheels. Bicycles include standard bikes, mountain bikes, and road bikes. This category include motorized bicycles or electric bikes.    |
| Electric Vehicle                      | Refers to small, golf car-like vehicles used for data collection purposes.                                                                                                            |
| Trailer                               | Non-motorized vehicles designed to be towed by a motor vehicle.                                                                                                                       |
| Pedestrian                            | Individuals traveling on foot. This category includes people walking or running.                                                                                                      |

Table A1. **Definitions of the annotation classes.**

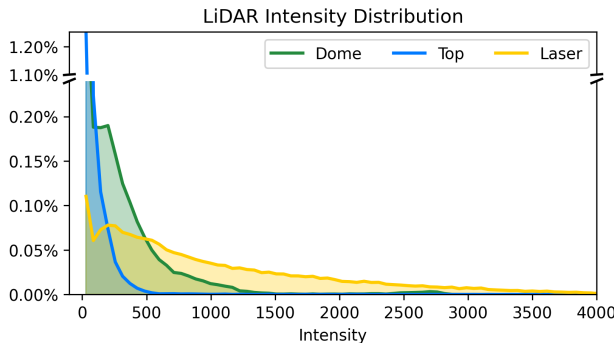

Figure A2. **Distribution of LiDAR intensities from RSU TOP, DOME, and Laser car sensors.** Each sensor shows different intensity ranges and distributions. EV-1 and EV-2 LiDAR sensors do not have intensity readings.

rigorous quality control measures to guarantee accurate and consistent labeled data, minimizing errors, and maintaining high standards.

### B.1. Definitions of the Annotation Classes

The Mixed Signals dataset categorizes road agents in different vehicle types and pedestrians. Categories such as “Car” and “Truck” encompass common passenger and large transport vehicles, while “Emergency Vehicle” covers ambulances, fire trucks, and police cars, highlighting their importance in urban scenarios. “Bus” labels are designated for large passenger vehicles typically used in public transporta-

tion. The dataset also distinguishes between “Motorcycle” and “Motorized Bike,” and “Portable Personal Mobility Vehicle,” which includes modern personal transport devices like electric scooters and hoverboards. Traditional “Bicycle” labels account for both standard and electric bikes. Labels for “Electric Vehicle” and “Trailer” ensure that smaller, often data-collection vehicles and towable units are accurately represented. Finally, we labeled humans as “Pedestrians”. In Table A1, we provide the definitions of the 10 fine-grained annotation classes in the Mixed Signals dataset. The breakdown of the fine-grain classes into the benchmarked classes can be found in the main text.

### B.2. Track Annotations and Multi-agent Tracking

We benchmark the performance of the planned tracking task for our dataset. The Mixed Signals dataset has labels for track ID’s, as seen in Figure 10 of the main text. We hope to include and benchmark tracking methods as an additional task which is supported by our dataset. We report some initial benchmarking results on the AB3DMOT tracking method [37] in Table A2. For further details about track labels, please explore the data itself; a distribution of the tracks are in Figure 9 of the main text.

### B.3. Annotation Details

The annotation process for this multi-sensor dataset involves handling joint scenes and synchronization discrep-

| Category   | sAMOTA | AMOTA | AMOTP |
|------------|--------|-------|-------|
| Vehicle    | 89.6   | 43.1  | 63.3  |
| Pedestrian | 76.6   | 32.6  | 42.8  |

Table A2. Tracking performance for AB3DMOT with V2X-ViT detections on the Mixed Signals validation split.

ancies between sensors. Due to time synchronization, fast-moving objects might appear slightly offset across the data collected from different sensors. To address these discrepancies, annotators were instructed to prioritize the roadside unit point cloud for bounding box creation, following a set hierarchy. When there is a mismatch, bounding boxes should be aligned with the point cloud in the following order: roadside unit, EVs, and the urban vehicle. For example, if there is a difference between the roadside unit and the vehicles’ point cloud, the bounding box should only be fitted around the roadside unit points. This ensures consistency in object localization across frames despite synchronization lags.

## C. Sensor Details

### C.1. Hardware and Synchronization Details

| Sensor         | Agent    | Range* | Channels | Vertical FOV |
|----------------|----------|--------|----------|--------------|
| Ouster OS1-128 | Vehicles | 170 m  | 128      | 45           |
| Ouster OS1-64  | RSU      | 100 m  | 64       | 45           |
| Ouster OS Dome | RSU      | 45 m   | 128      | 180          |

\*Based on 80% Lambertian reflectivity in the sensors’ official datasheets.

Table A3. **Hardware specifications.**

Synchronization is especially important in dynamic environments, as any introduced time shifts can lead to positional inconsistencies, resulting in multiple detections of the same object. The sensors in our multi-agent system were timestamped using GPS time as a common reference, and sensor details are provided in [Table A3](#). Rotational LiDARs continuously scan the environment in 360 degrees, thus, different portions of the surroundings are captured at slightly different times during a full rotation. When vehicles are in motion, their positions and orientations change dynamically between LiDARs sweeps. The maximum time gap for matching sensor readings between 10 Hz rotational sensors is 50 ms. Since sensors rotate fully in 100 ms, angular positions differ by at most 180 degrees. If the time difference between readings were larger than 50 ms, it would be matched with the next or previous rotation instead. As shown in the original manuscript, precise sensor synchronization, robust multi-agent localization, and clearly defined annotation protocols produced high-quality data association across all sensors.

### C.2. Localization

Localization is one of the most critical tasks for CAV, estimating their position relative to a global reference frame. One of the most commonly used sensors for localization is the Global Navigation Satellite System (GNSS). GNSS offers access to a satellite constellation that provides global positioning via triangulation. However, despite its widespread use, GNSS has several drawbacks, particularly in urban environments. Its accuracy can be reduced in urban canyons, where tall buildings block or reflect signals, leading to degraded positioning accuracy. To overcome this problem, we use dense and accurate point cloud maps [\[31\]](#) as references for our localization algorithm.

### C.3. Definition of Heterogeneity in Sensor Suite

Heterogeneity in our context refers to the variability between LiDAR sensors and platform geometry within a single dataset. Heterogeneity can appear in multiple forms [\[17\]](#); our dataset represents it in five LiDARs that span three models, each mounted in four configurations. In line with the feedback, Tab. 1 of the original manuscript has been updated accordingly. Our dataset demonstrates a realistic setting where collaborative agents have different LiDAR models and position them in different configurations.

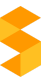

# Spec Document – Multi-sensor labeling

[Additional resources](#)

[Sensor information](#)

[3D sensors](#)

[Type of task](#)

[3D labeling](#)

[Labeling rules](#)

[General labeling rules](#)

[Specific rules for cuboid labeling of instance classes](#)

[Specific rules for 3D polygon/polyline labeling](#)

[Categories](#)

[Attributes](#)

[Frame-level attributes](#)

[Object-level attributes](#)

[Edge cases](#)

[Version history of labeling specification document](#)

[Additional Q&A](#)

## Additional resources

### Getting Started

Begin by ensuring the point clouds are **not** visualized with the default gradient coloring (and to disable the color-by-gradient). The data is colored by the sensors they are collected from, and should be colored green, blue, orange, yellow, and pink. To do so, follow the instructions:

1. Click on the `Settings` tab of the control panel
2. Scroll to `Point cloud display` and un-check the `Gradient coloring` tab

Everything is correct if there are only 5 colors (green, blue, orange, yellow, and pink) displayed.

The screenshot shows the 'Settings' tab of the Segments.ai control panel. The 'Point cloud display' section is visible, containing a 'Point size' slider and two checkboxes: 'Show point cloud overlay on images' (checked) and 'Gradient coloring' (unchecked). A red arrow points to the 'Gradient coloring' checkbox. The 'Object display' section above it shows 'Object coloring' set to 'By category'. The 'Interface' section shows 'Layout' set to 'Layout 1'. The 'Hotkeys' section is at the top.

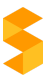

**Discrepancy Resolution**

Due to time synchronization issues, a single object may have different scans (discrepancy between sensors). This may occur for fast moving vehicles. When this happens, fit a bounding box **onto a single sensor**, prioritizing the point cloud colors in the order of: green, yellow, orange, pink, and (lastly) blue. For example, if there is a discrepancy between the blue points and green points, ignore the blue points and fit a bounding box only on the green points.

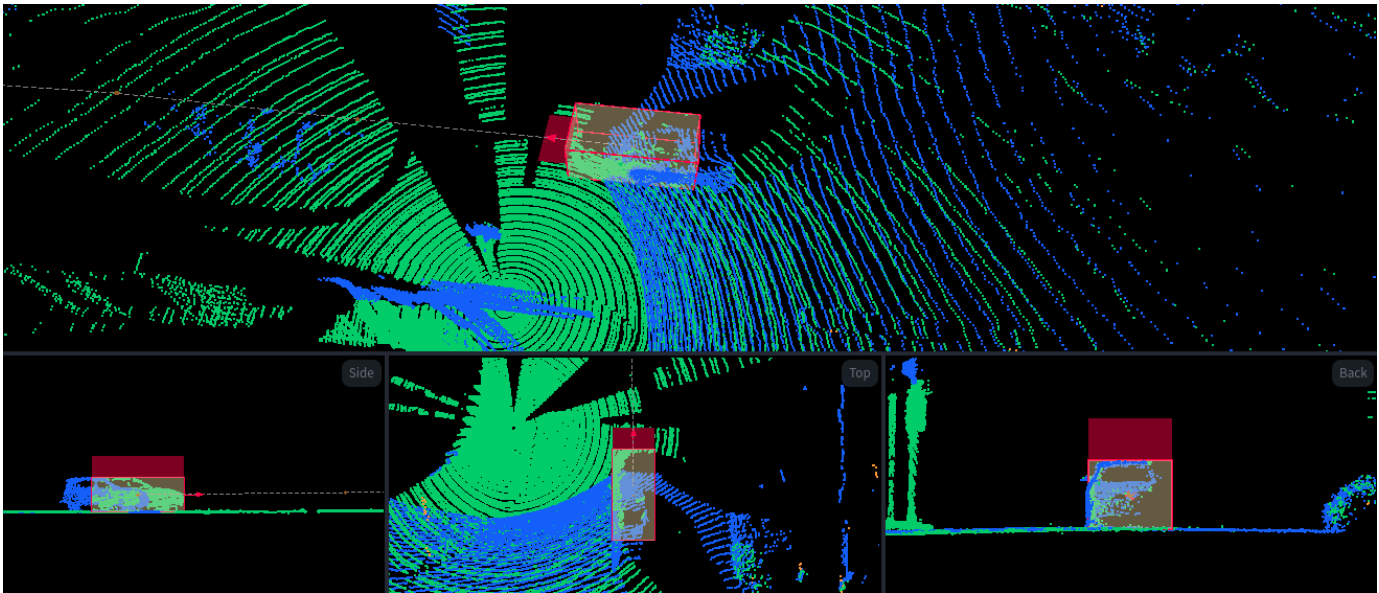

**Special Vehicle Cases**

We have 2 electric data-collection vehicles (EV). If they show up in other sensors, label them as **Electric Vehicle (EV)** category. They look like small golf cars.

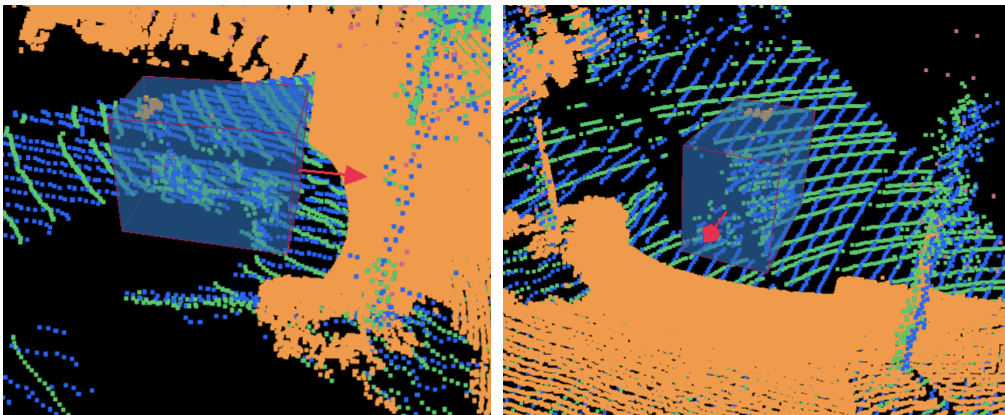

|                                      |                                                                                                                                       |
|--------------------------------------|---------------------------------------------------------------------------------------------------------------------------------------|
| Link to external labeling guidelines | N/A (see above)                                                                                                                       |
| Link to reference labeled dataset    | <a href="https://mobility-lab.seas.ucla.edu/v2v4real/#dataannotation">https://mobility-lab.seas.ucla.edu/v2v4real/#dataannotation</a> |
| Link to initial unlabeled dataset    | TBD ▾                                                                                                                                 |

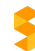

## Sensor information

### 3D sensors

| Type of 3D sensors<br><i>E.g. Velodyne, ...</i><br><br><i>(Add lines where needed)</i> | How many sensors? | File format?<br><a href="#">More info</a> | Point clouds in local or world reference system? | In case of local reference system, ego poses available? | Number of frames per sequence + Sampling rate?              | Typical file size / point quantity per frame? | Comments |
|----------------------------------------------------------------------------------------|-------------------|-------------------------------------------|--------------------------------------------------|---------------------------------------------------------|-------------------------------------------------------------|-----------------------------------------------|----------|
| <i>One single point cloud composed of multiple Ouster Lidar point clouds</i>           | 3-6               | PCD                                       | World reference                                  | TBD ▾                                                   | 40 - 41 frames per sequence (20 s/seq) : sampling rate 2 hz |                                               |          |
|                                                                                        |                   |                                           | TBD ▾                                            | TBD ▾                                                   |                                                             |                                               |          |

## Type of task

### 3D labeling

|                                     | Type of labeling | Comments                            |
|-------------------------------------|------------------|-------------------------------------|
| <input checked="" type="checkbox"/> | 3D cuboids       | 3D bounding box on point cloud data |
| <input type="checkbox"/>            | 3D segmentation  |                                     |
| <input type="checkbox"/>            | 3D polylines     |                                     |
| <input type="checkbox"/>            | 3D polygons      |                                     |
| <input type="checkbox"/>            | 3D keypoints     |                                     |

## Labeling rules

### General labeling rules

| Rule                                      | Answer                  | Default assumption going forward without explicit answer from customer | Comments                                                            |
|-------------------------------------------|-------------------------|------------------------------------------------------------------------|---------------------------------------------------------------------|
| Maximum distance to label objects?        | Everything ▾            | Everything ▾                                                           | See ability to set a visual radius for taskers <a href="#">here</a> |
| Other zones that do not require labeling? | Label everything ▾      | Label everything ▾<br><i>including e.g. car parks</i>                  |                                                                     |
| What to do with unclear objects/areas?    | Do not label ▾          | Do not label ▾                                                         |                                                                     |
| What to do with reflections?              | Do not label ▾          | Do not label ▾                                                         |                                                                     |
| How to cope with groups of individual     | Label each individual ▾ | Label each individual ▾                                                |                                                                     |



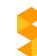

|                                                                                |                    |                    |  |
|--------------------------------------------------------------------------------|--------------------|--------------------|--|
| instances?                                                                     |                    |                    |  |
| Are there any specific rules to adverse weather conditions / nighttime / etc.? | Same as day time - | Same as day time - |  |

#### Specific rules for cuboid labeling of instance classes

| Type                 | Rule                                                                                                                          | Answer                                                                                                                                                           | Default assumption going forward without explicit answer from customer                                                                             | Comments                                                                                                                                                                                                                                                                  |
|----------------------|-------------------------------------------------------------------------------------------------------------------------------|------------------------------------------------------------------------------------------------------------------------------------------------------------------|----------------------------------------------------------------------------------------------------------------------------------------------------|---------------------------------------------------------------------------------------------------------------------------------------------------------------------------------------------------------------------------------------------------------------------------|
| Position -           | Can there be some overlap between cuboid & ground plane, or should cuboids be leveled with the ground plane where applicable? | Slight overlap is OK -                                                                                                                                           | Slight overlap is OK -                                                                                                                             |                                                                                                                                                                                                                                                                           |
| Rotation & Heading - | Label only yaw, or yaw & pitch & roll?                                                                                        | Yaw, roll & pitch -                                                                                                                                              | Yaw, roll & pitch -                                                                                                                                | Please note that labeling also pitch & roll can reduce throughput with up to a factor 2                                                                                                                                                                                   |
| Rotation & Heading - | What should the yaw direction/heading be of an object?                                                                        | Main face of object -                                                                                                                                            | Main face of object -                                                                                                                              |                                                                                                                                                                                                                                                                           |
| Rotation & Heading - | What should the yaw direction/heading be of a faceless object, e.g. a cone?                                                   | TBD -<br>Do Not Label Faceless Categories                                                                                                                        | TBD -                                                                                                                                              | Do not label "cones" or other faceless object categories                                                                                                                                                                                                                  |
| Dimensions -         | Is there a minimum size of cuboid?                                                                                            | No -                                                                                                                                                             | No -                                                                                                                                               |                                                                                                                                                                                                                                                                           |
| Dimensions -         | Should cuboids be labeled with default dimensions depending on their category?                                                | No -                                                                                                                                                             | No -                                                                                                                                               |                                                                                                                                                                                                                                                                           |
| Dimensions -         | Can the dimensions of a cuboid change throughout a sequence?                                                                  | Yes -<br>No for: vehicles and rigid objects                                                                                                                      | Yes -<br>when needed                                                                                                                               |                                                                                                                                                                                                                                                                           |
| Dimensions -         | What should the dimension of a cuboid be based on?                                                                            | Realistic size, namely ... -<br><i>[copied over] In order of importance: default dimensions / on the available 3D points elsewhere / on the reference images</i> | Realistic size, namely ... -<br><i>In order of importance: default dimensions / on the available 3D points elsewhere / on the reference images</i> | Visible 3D points: only using the visible 3D points in the current frame, disregarding the realistic size<br><br>Realistic size: e.g. based on the available 3D points elsewhere in the sequence, on the available reference images or on the provided default dimensions |
| Dimensions -         | How tight should a cuboid be?                                                                                                 | Loose -<br><br>As tight as possible, but can be a bit larger than the object itself. Ensure all parts are within the cuboid, see "Extremities" sections          | Loose -                                                                                                                                            | Very tight: in each frame, there should not be any space between the outer points and the cuboid<br><br>Loose: the cuboid can be a bit larger than the object itself                                                                                                      |
| Occlusion -          | Should an object be labeled if it is only visible on 3D sensors and not on 2D sensors?                                        | Yes -                                                                                                                                                            | Yes -                                                                                                                                              |                                                                                                                                                                                                                                                                           |



|                     |                                                                                                                                                                  |                                                                                                                                                |                                                                                                                                                                                 |                                                                                                                                                                     |
|---------------------|------------------------------------------------------------------------------------------------------------------------------------------------------------------|------------------------------------------------------------------------------------------------------------------------------------------------|---------------------------------------------------------------------------------------------------------------------------------------------------------------------------------|---------------------------------------------------------------------------------------------------------------------------------------------------------------------|
| Occlusion ▾         | Should an object be labeled if it is only visible on 2D sensors and not on 3D sensors?                                                                           | Minimum of 10 points ▾                                                                                                                         | Minimum of 10 points ▾                                                                                                                                                          |                                                                                                                                                                     |
| Occlusion ▾         | Should an object be labeled with the same track ID if it re-enters a scene or becomes unoccluded again?                                                          | Yes ▾                                                                                                                                          | Yes ▾                                                                                                                                                                           |                                                                                                                                                                     |
| Extremities ▾       | Should fixed extremities / protruding parts be included in the cuboid?                                                                                           | Custom ... ▾<br><b>Include:</b> side mirrors, larger protruding parts such as bonnet<br><b>Exclude:</b> small protruding parts such as antenna | Custom ... ▾<br><b>Include:</b> side mirrors, larger protruding parts such as bonnet<br><b>Exclude:</b> small protruding parts such as antenna                                  |                                                                                                                                                                     |
| Extremities ▾       | Should variable/articulating extremities be included in the current cuboid, or be annotated with separate cuboids?                                               | Custom ... ▾<br><b>Include:</b> rider, people in/on vehicles, non-vehicle objects on trucks<br><b>Exclude:</b> vehicles on trucks              | Custom ... ▾<br><b>Include:</b> rider, cars on trailers, people in/on vehicles<br><b>Exclude</b> (only when a relevant category is available): person trolley, car trailer, ... |                                                                                                                                                                     |
| Extremities ▾       | Include relational tracker for variable extremities?                                                                                                             | No ▾                                                                                                                                           | No ▾                                                                                                                                                                            | If yes: if a car has object ID 10, and a trailer is attached to this car, the trailer will be annotated separately and receive a relational attribute with value 10 |
| Issues/exceptions ▾ | Can cuboids overlap?                                                                                                                                             | Only in reasonable cases ▾                                                                                                                     | Only in reasonable cases ▾                                                                                                                                                      | Reasonable cases: articulating objects (turning truck with trailer attached, ...), bicycles standing very close to each other, ...                                  |
| Issues/exceptions ▾ | What to do with unclear objects?                                                                                                                                 | Use 'unsure' category ▾                                                                                                                        | Use 'unsure' category ▾                                                                                                                                                         |                                                                                                                                                                     |
| Issues/exceptions ▾ | In case of bad calibration, how should the cuboid be fitted? should the cuboid be fitted to the 3D point cloud or rather to the most confident reference images? | Fit to 3D ▾                                                                                                                                    | Fit to 3D ▾                                                                                                                                                                     |                                                                                                                                                                     |
| Issues/exceptions ▾ | In case of bad ego poses and data drift, what should happen?                                                                                                     | Fit on each frame ▾                                                                                                                            | Fit on each frame ▾                                                                                                                                                             |                                                                                                                                                                     |

#### Specific rules for 3D polygon/polyline labeling

| Type | Rule | Answer | Default assumption going forward without explicit answer from customer | Comments |
|------|------|--------|------------------------------------------------------------------------|----------|
|------|------|--------|------------------------------------------------------------------------|----------|



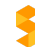

|               |                                                                          |       |       |                                                                                              |
|---------------|--------------------------------------------------------------------------|-------|-------|----------------------------------------------------------------------------------------------|
| Temporality - | Can nodes be added/removed from polygons/polylines after initialization? | No -  | No -  | Note: currently not yet compatible with interpolation (below); on short-term roadmap         |
| Temporality - | Should interpolation be enabled?                                         | Yes - | Yes - | Note: currently not yet compatible with adding/removing nodes (above); on short-term roadmap |

Categories

| Category                           | Label instances? | To be labeled across all sensors & tasks? | What does it include?                                                                                                                                        | What does it exclude?                                                                 | Comments |
|------------------------------------|------------------|-------------------------------------------|--------------------------------------------------------------------------------------------------------------------------------------------------------------|---------------------------------------------------------------------------------------|----------|
| Car                                | Yes -            | No, only 3D -                             | <ul style="list-style-type: none"><li>Sedan</li><li>SUV</li><li>Minivan</li><li>All personal/recreational vehicles</li></ul>                                 | <ul style="list-style-type: none"><li>Speed bumps</li><li>Raised crosswalks</li></ul> |          |
| Truck                              | Yes -            | No, only 3D -                             |                                                                                                                                                              |                                                                                       |          |
| Emergency Vehicle                  | Yes -            | No, only 3D -                             | <ul style="list-style-type: none"><li>Police Cars</li><li>Ambulance</li></ul>                                                                                |                                                                                       |          |
| Bus                                | Yes -            | No, only 3D -                             |                                                                                                                                                              |                                                                                       |          |
| Motorcycle/Motorized Bike          | Yes -            | No, only 3D -                             | <ul style="list-style-type: none"><li>Motorcycles</li><li>Electric/Motorized Bike</li><li>Scoters</li></ul>                                                  |                                                                                       |          |
| Portable Personal Mobility Vehicle | Yes -            | No, only 3D -                             | <ul style="list-style-type: none"><li>Segway</li><li>Moped</li></ul>                                                                                         |                                                                                       |          |
| Bicycle                            | Yes -            | No, only 3D -                             |                                                                                                                                                              |                                                                                       |          |
| Pedestrian                         | Yes -            | No, only 3D -                             | <ul style="list-style-type: none"><li>Pedestrians crossing</li><li>Pedestrians with strollers (label a single box for both)</li></ul>                        |                                                                                       |          |
| Electric Vehicle (EV)              | Yes -            | No, only 3D -                             | <ul style="list-style-type: none"><li>Data collection golf car vehicle</li></ul>                                                                             |                                                                                       |          |
| Trailer                            | Yes -            | No, only 3D -                             | <ul style="list-style-type: none"><li>Trailer attached to vehicle</li><li>Wagon</li><li>Other vehicles attached to a pickup-truck/utility vehicles</li></ul> |                                                                                       |          |

Attributes

Frame-level attributes  
N/A

| Attribute | Type | Options | Description | Comments |
|-----------|------|---------|-------------|----------|
|-----------|------|---------|-------------|----------|

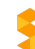

|  |       |  |  |  |
|--|-------|--|--|--|
|  | TBD ▾ |  |  |  |
|--|-------|--|--|--|

Object-level attributes  
N/A

| Attribute    | Type         | Applicable categories                                                                                  | Options            | Description                                                                                                                                         | Comments |
|--------------|--------------|--------------------------------------------------------------------------------------------------------|--------------------|-----------------------------------------------------------------------------------------------------------------------------------------------------|----------|
| Motion State | Select box ▾ | All categories (Car, Truck, Emergency Vehicle, Bus, Motorcycle, Bike, Pedestrian, Portable Vehicle...) | In-Motion / Static | Select if the object is in motion during the frame. Either select that it is in-motion (currently moving) or static (waiting, parked, stopped, etc) |          |

Edge cases

| Edge Case | How to handle it | Example |
|-----------|------------------|---------|
| Extreme   |                  |         |

Version history of labeling specification document  
N/A

| Date | Version | Changes |
|------|---------|---------|
|      |         |         |

Additional Q&A

| Date       | Question status | Question & assumptions                                                                                                          | Reference Image/ Link                                                               | Answer                                                                                                                                                 |
|------------|-----------------|---------------------------------------------------------------------------------------------------------------------------------|-------------------------------------------------------------------------------------|--------------------------------------------------------------------------------------------------------------------------------------------------------|
| 03/02/2024 | Assumption ▾    | I do not see only 4 colors, and instead see the default gradient point color scheme. How do I toggle off the gradient coloring? | 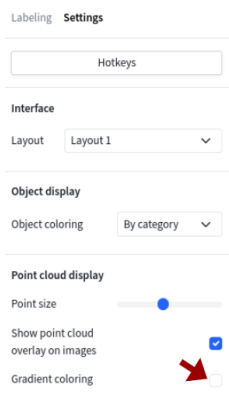 | Click on the "Settings" tab, and make sure "Gradient coloring" is <b>not</b> selected. See <i>Additional Resources</i> : Getting Started instructions. |

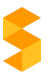

|            |              |                                                                                                                                                           |                                                                                    |                                                                                                                                                                                                                                                                                                                                                                         |
|------------|--------------|-----------------------------------------------------------------------------------------------------------------------------------------------------------|------------------------------------------------------------------------------------|-------------------------------------------------------------------------------------------------------------------------------------------------------------------------------------------------------------------------------------------------------------------------------------------------------------------------------------------------------------------------|
| 03/02/2024 | Assumption ▾ | <p>There are time synchronization issues, where fast moving objects are captured differently by different colored point clouds. How do I label these?</p> | 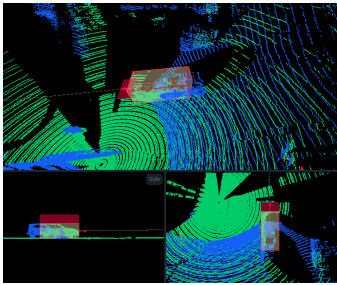 | <p>Fit a tight bounding box around the point cloud of a single color, prioritizing in the order of:</p> <ol style="list-style-type: none"><li>1. Green</li><li>2. Yellow</li><li>3. Orange</li><li>4. Pink</li><li>5. Blue</li></ol> <p>In this example, only draw a bounding box around the green points. See <i>Additional Resources</i>: Discrepancy Resolution.</p> |
|------------|--------------|-----------------------------------------------------------------------------------------------------------------------------------------------------------|------------------------------------------------------------------------------------|-------------------------------------------------------------------------------------------------------------------------------------------------------------------------------------------------------------------------------------------------------------------------------------------------------------------------------------------------------------------------|
